# Supplementary material
Source: publisher figshare collection journal article supplement (https://brill.figshare.com/articles/dataset/_/9165881)
Supplement: Supplementary file 1 [file 1]

**A certain note on the wrestling behavior of *Haemadipsa picta*  
leeches**

Maja Peryga and Krzysztof Miler\*

*Institute of Environmental Sciences, Jagiellonian University, Kraków, Poland*

\*Corresponding author. E-mail: krzysztof.miler@uj.edu.pl

**Supplementary material**

Video S1. Footage of two *Haemadipsa picta* leeches engaged in the wrestling behavior?

Video recorded 1 August 2018 by M. Peryga.
